# Supplementary material for: Prevalence and determinants of hepatitis B, hepatitis C, and liver injury among people living with HIV on antiretroviral therapy in the Upper East Region of Ghana
Source: Research Square preprint supplement (doi:10.21203/rs.3.rs-7845134/v1), 2025-10-30
Supplement: Supplementary file 1 [file 52708119f229640e35e6e2eb.pdf]

## QUESTIONNAIRE

Site: \_\_\_\_\_ Subject ID: \_\_\_\_\_ Date of enrolment: \_\_\_\_\_

### SOCIODEMOGRAPHIC DATA

1. Age: \_\_\_\_\_ years DoB: \_\_\_\_\_
2. Gender: Male ☐ Female ☐
3. Marital status ☐ Married ☐ Single ☐ Divorced ☐ Others (Specify): \_\_\_\_\_
4. Religion ☐ Christian ☐ Muslim ☐ Traditional ☐ Other (Specify): \_\_\_\_\_
5. Area of residence: \_\_\_\_\_ ☐ Urban ☐ Rural
6. Educational status ☐ None ☐ Primary to High school ☐ Tertiary
7. Employment status: ☐ Unemployed ☐ Self-employed ☐ Civil/public servant
8. Family history of hypertension Yes ☐ No ☐ Do not Know ☐
9. Family history of diabetes Yes ☐ No ☐ Do not Know ☐
10. Family history of mental health Yes ☐ No ☐ Do not Know ☐
11. Level of physical activity ☐ Moderate /vigorous intensity ☐ Low intensity
12. Have you taken some food today? Yes ☐ No ☐

### CLINICAL DATA AND HISTORY

13. Weight: \_\_\_\_\_ kg Height: \_\_\_\_\_ m BMI: \_\_\_\_\_ kg/m<sup>2</sup>
14. Blood Pressure (systolic/diastolic): \_\_\_\_\_ / \_\_\_\_\_ mmHg
15. Are you taking any anti-hypertensive drugs? Yes ☐ No ☐

16. MOCA test score: \_\_\_\_\_

17. Duration of HIV diagnosis: \_\_\_\_\_ years OR \_\_\_\_\_ months

18. Duration on ART: \_\_\_\_\_ years OR \_\_\_\_\_ months OR ☐ None

### 19. ART Regimen

- 1<sup>st</sup> line ARV (Tenofovir + Lamivudine + Dolutegravir)
- 2<sup>nd</sup> line ARV (Zidovudine + Lamivudine + Lopinavir)
- 3<sup>rd</sup> line ARV (Darunavir + Zidovudine + Efavirenz)
- Paediatric: 1<sup>st</sup> line ARV (Abacavir + Lamivudine Emtricitabine)

20. Drug Resistance status ☐ Normal ☐ Intermediate ☐ Resistant

21. WHO Staging ☐ 1 ☐ 2 ☐ 3 ☐

### 22. Viral load

- |                                       |                                                               |
|---------------------------------------|---------------------------------------------------------------|
| • 1 <sup>st</sup> : _____ (copies/ml) | <input type="checkbox"/> 6 <sup>th</sup> : _____ (copies/ml)  |
| • 2 <sup>nd</sup> : _____ (copies/ml) | <input type="checkbox"/> 7 <sup>th</sup> : _____ (copies/ml)  |
| • 3 <sup>rd</sup> : _____ (copies/ml) | <input type="checkbox"/> 8 <sup>th</sup> : _____ (copies/ml)  |
| • 4 <sup>th</sup> : _____ (copies/ml) | <input type="checkbox"/> 9 <sup>th</sup> : _____ (copies/ml)  |
| • 5 <sup>th</sup> : _____ (copies/ml) | <input type="checkbox"/> 10 <sup>th</sup> : _____ (copies/ml) |

### 23. CD4 count

- |                                                    |                                                                            |
|----------------------------------------------------|----------------------------------------------------------------------------|
| • 1 <sup>st</sup> : _____ (cells/mm <sup>3</sup> ) | <input type="checkbox"/> 6 <sup>th</sup> : _____ (cells/mm <sup>3</sup> )  |
| • 2 <sup>nd</sup> : _____ (cells/mm <sup>3</sup> ) | <input type="checkbox"/> 7 <sup>th</sup> : _____ (cells/mm <sup>3</sup> )  |
| • 3 <sup>rd</sup> : _____ (cells/mm <sup>3</sup> ) | <input type="checkbox"/> 8 <sup>th</sup> : _____ (cells/mm <sup>3</sup> )  |
| • 4 <sup>th</sup> : _____ (cells/mm <sup>3</sup> ) | <input type="checkbox"/> 9 <sup>th</sup> : _____ (cells/mm <sup>3</sup> )  |
| • 5 <sup>th</sup> : _____ (cells/mm <sup>3</sup> ) | <input type="checkbox"/> 10 <sup>th</sup> : _____ (cells/mm <sup>3</sup> ) |

### 24. HIV type

HIV1 ☐ HIV2 ☐ HIV1/2 ☐

**25. Opportunistic infection present** ☐ No ☐ Yes (specify): \_\_\_\_\_

**26. Do you know your HBV status?** Yes ☐ No ☐ Do not know ☐

**27. HBV test results?** Positive ☐ Negative ☐

**28. Have you been vaccinated against HBV?** Yes ☐ No ☐

**29. Are you on any anti-HBV drugs?** Yes ☐ No ☐

**30. Do you know your HCV status?** Yes ☐ No ☐ Do not know ☐

**31. HCV test results?** Positive ☐ Negative ☐

**32. Are you on any anti-HCV drugs?** Yes ☐ No ☐

**33. Are you diabetic?** Yes ☐ No ☐ Do not know ☐

**34. Are you taking any anti-diabetic drugs?** Yes ☐ No ☐

**35. Do you have any kidney disease?** Yes ☐ No ☐ Do not know ☐

**36. Have you been diagnosed with any cardiovascular disease?**  
Yes ☐ No ☐ Do not know ☐

**37. Have you been diagnosed with cancer?** Yes ☐ No ☐ Do not know ☐

**38. Have you been diagnosed with asthma?** Yes ☐ No ☐ Do not know ☐

**39. Have you been diagnosed with osteoporosis?** Yes ☐ No ☐ Do not know ☐

**40. Have you recorded episodes of depression?** Yes ☐ No ☐ Do not know ☐

**41. Have you been diagnosed with any mental health condition?**  
Yes ☐ No ☐ Do not know ☐

**42. Do you take alcohol?** Yes ☐ No ☐

**43. Do you smoke or take tobacco?** Yes ☐ No ☐

**44. Are you on any herbal medication?**

Yes ☐ No ☐ Do not know ☐

**45. Do you take any hard drugs?**

Yes ☐ No ☐

**46. Form completed by (initials):** \_\_\_\_\_
